# Supplementary material for: Ferula sinkiangensis (Chou-AWei, Chinese Ferula): Traditional Uses, Phytoconstituents, Biosynthesis, and Pharmacological Activities
Source: MDPI journal article supplement (doi:10.3390/plants12040902), 2023-02-16
Supplement: s1 [file s1]

## Supplementary Materials

Review

# ***Ferula sinkiangensis* (Chou-AWei, Chinese *Ferula*): Traditional Uses, Phyto-constituents, Biosynthesis, and Pharmacological Activities**

**Maan T. Khayat <sup>1</sup>, Majed Alharbi,<sup>1</sup> Kholoud F. Ghazawi <sup>2</sup>, Gamal A. Mohamed <sup>3</sup>, and Sabrin R. M. Ibrahim<sup>4,5,\*</sup>**

<sup>1</sup> Department of Pharmaceutical Chemistry, Faculty of Pharmacy, King Abdulaziz University, Jeddah 21589, Saudi Arabia

<sup>2</sup> Clinical Pharmacy Department, College of Pharmacy, Umm Al-Qura University, Makkah 24382, Saudi Arabia

<sup>3</sup> Department of Natural Products and Alternative Medicine, Faculty of Pharmacy,

King Abdulaziz University, Jeddah 21589, Saudi Arabia

<sup>4</sup> Preparatory Year Program, Department of Chemistry, Batterjee Medical College, Jeddah 21442, Saudi Arabia

<sup>5</sup> Department of Pharmacognosy, Faculty of Pharmacy, Assiut University, Assiut 71526, Egypt

\* Correspondence: [sabrin.ibrahim@bmc.edu.sa](mailto:sabrin.ibrahim@bmc.edu.sa); Tel.: +966-581183034

**Table S1.** Secondary metabolites reported from *Ferula sinkiangensis* (Chemical class, molecular weight and formulae, plant part, and origin).

| Compound Name/Chemical class             | Mol. Wt. | Mol. Formula                                   | Plant part | Location/Source                                                  | Ref. |
|------------------------------------------|----------|------------------------------------------------|------------|------------------------------------------------------------------|------|
| Bicyclic sesquiterpene coumarins         |          |                                                |            |                                                                  |      |
| Farnesiferol A (1)                       | 382.21   | C <sub>24</sub> H <sub>30</sub> O <sub>4</sub> | Gum resin  | Xinjiang, China                                                  | [48] |
|                                          | -        | -                                              | Resin      | Baishitun mountain, Yili state, Xinjiang Uygur Autonomous, China | [39] |
| Colladonin (2)                           | 382.21   | C <sub>24</sub> H <sub>30</sub> O <sub>4</sub> | Seeds      | Yili state, Xinjiang Uygur Autonomous Region, China              | [50] |
| Coladin (3)                              | 438.24   | C <sub>27</sub> H <sub>34</sub> O <sub>5</sub> | Resin      | Xinjiang, China                                                  | [25] |
| Isofeterin (4)                           | 440.21   | C <sub>26</sub> H <sub>32</sub> O <sub>6</sub> | Roots      | Xin jiang Uygur Autonomous Region, China                         | [30] |
| Farnesiferone A (5)                      | 380.19   | C <sub>24</sub> H <sub>28</sub> O <sub>4</sub> | Gum resin  | Xinjiang, China                                                  | [48] |
|                                          | -        | -                                              | Resin      | Xinjiang, China                                                  | [25] |
|                                          | -        | -                                              | Resin      | Baishitun mountain, Yili state, Xinjiang Uygur Autonomous, China | [39] |
| Assafoetidnol A (6)                      | 398.49   | C <sub>24</sub> H <sub>30</sub> O <sub>5</sub> | Resin      | Baishitun mountain, Yili state, Xinjiang Uygur Autonomous, China | [39] |
| Gummosin (7)                             | 382.21   | C <sub>24</sub> H <sub>30</sub> O <sub>4</sub> | Gum resin  | Xinjiang, China                                                  | [48] |
|                                          | -        | -                                              | Resin      | Baishitun mountain, Yili state, Xinjiang Uygur Autonomous, China | [39] |
| Polyanthinin (8)                         | 424.22   | C <sub>26</sub> H <sub>32</sub> O <sub>5</sub> | Gum resin  | Xinjiang, China                                                  | [48] |
|                                          | -        | -                                              | Resin      | Baishitun mountain, Yili state, Xinjiang Uygur Autonomous, China | [39] |
| Assafoetidnol B (9)                      | 456.21   | C <sub>26</sub> H <sub>32</sub> O <sub>7</sub> | Resin      | Baishitun mountain, Yili state, Xinjiang Uygur Autonomous, China | [39] |
| Sinkiangenol E (10)                      | 440.21   | C <sub>26</sub> H <sub>32</sub> O <sub>6</sub> | Resin      | Baishitun mountain, Yili state, Xinjiang Uygur Autonomous, China | [39] |
| Ferukrin (11)                            | 400.22   | C <sub>24</sub> H <sub>32</sub> O <sub>5</sub> | Gum resin  | Xinjiang, China                                                  | [48] |
|                                          | -        | -                                              | Resin      | Baishitun mountain, Yili state, Xinjiang Uygur Autonomous, China | [39] |
| (3'S, 5'S, 8'R, 9'S, 10'R)-Kellerin (12) | 442.23   | C <sub>26</sub> H <sub>34</sub> O <sub>6</sub> | Gum resin  | Xinjiang, China                                                  | [48] |

| Compound Name/Chemical class                     | Mol. Wt. | Mol. Formula                                   | Plant part | Location/Source                                                  | Ref. |
|--------------------------------------------------|----------|------------------------------------------------|------------|------------------------------------------------------------------|------|
|                                                  | -        | -                                              | Resin      | Baishitun mountain, Yili state, Xinjiang Uygur Autonomous, China | [39] |
| (3'S, 5'S, 8'R, 9'S, 10'R)-Deacetylkellerin (13) | 400.22   | C <sub>24</sub> H <sub>32</sub> O <sub>5</sub> | Gum resin  | Xinjiang, China                                                  | [48] |
|                                                  | -        | -                                              | Resin      | Baishitun mountain, Yili state, Xinjiang Uygur Autonomous, China | [39] |
| Colladocin (14)                                  | 442.23   | C <sub>26</sub> H <sub>34</sub> O <sub>6</sub> | Resin      | Baishitun mountain, Yili state, Xinjiang Uygur Autonomous, China | [39] |
| Episamarcandin (15)                              | 400.22   | C <sub>24</sub> H <sub>32</sub> O <sub>5</sub> | Roots      | Xinjiang, China                                                  | [19] |
|                                                  | -        | -                                              | Seeds      | Yili state, Xinjiang Uygur Autonomous Region, China              | [50] |
| (5'S, 8'R, 9'S, 10'R)-Ferukrinone (16)           | 398.20   | C <sub>24</sub> H <sub>30</sub> O <sub>5</sub> | Gum resin  | Xinjiang, China                                                  | [48] |
|                                                  | -        | -                                              | Resin      | Baishitun mountain, Yili state, Xinjiang Uygur Autonomous, China | [39] |
| Sinkiangenol D (17)                              | 442.23   | C <sub>26</sub> H <sub>34</sub> O <sub>6</sub> | Resin      | Baishitun mountain, Yili state, Xinjiang Uygur Autonomous, China | [39] |
| Isosamarcandin (18)                              | 380.19   | C <sub>24</sub> H <sub>28</sub> O <sub>4</sub> | Roots      | Xinjiang, China                                                  | [19] |
| Feselol (19)                                     | 382.21   | C <sub>24</sub> H <sub>30</sub> O <sub>4</sub> | Seeds      | Yili state, Xinjiang Uygur Autonomous Region, China              | [50] |
| Ferocaulidin (20)                                | 396.19   | C <sub>24</sub> H <sub>28</sub> O <sub>5</sub> | Resin      | Baishitun mountain, Yili state, Xinjiang Uygur Autonomous, China | [39] |
| Sinkiangenol A (21)                              | 454.19   | C <sub>26</sub> H <sub>30</sub> O <sub>7</sub> | Resin      | Baishitun mountain, Yili state, Xinjiang Uygur Autonomous, China | [39] |
| Sinkiangenol B (22)                              | 412.18   | C <sub>24</sub> H <sub>28</sub> O <sub>6</sub> | Resin      | Baishitun mountain, Yili state, Xinjiang Uygur Autonomous, China | [39] |
| (3'S, 8'R, 9'S, 10'R)-Sinkianol A (23)           | 382.21   | C <sub>24</sub> H <sub>30</sub> O <sub>4</sub> | Gum resin  | Xinjiang, China                                                  | [48] |
| Lehmannolol (24)                                 | 384.23   | C <sub>24</sub> H <sub>32</sub> O <sub>4</sub> | Roots      | Xin jiang Uygur Autonomous Region, China,                        | [30] |
|                                                  | -        | -                                              | Seeds      | Yili state, Xinjiang Uygur Autonomous Region, China              | [50] |
|                                                  | -        | -                                              | Seeds      | Yili state, Xinjiang Uygur Autonomous Region, China              | [24] |

| Compound Name/Chemical class                         | Mol. Wt. | Mol. Formula                                   | Plant part | Location/Source                                                  | Ref. |
|------------------------------------------------------|----------|------------------------------------------------|------------|------------------------------------------------------------------|------|
|                                                      | -        | -                                              | Resin      | Baishitun mountain, Yili state, Xinjiang Uygur Autonomous, China | [39] |
| Lehmannolone (25)                                    | 382.21   | C <sub>24</sub> H <sub>30</sub> O <sub>4</sub> | Roots      | Xin jiang Uygur Autonomous Region, China,                        | [30] |
|                                                      | -        | -                                              | Seeds      | Yili state, Xinjiang Uygur Autonomous Region, China              | [50] |
|                                                      | -        | -                                              | Resin      | Xinjiang, China                                                  | [25] |
| Kamolone (26)                                        | 382.21   | C <sub>24</sub> H <sub>30</sub> O <sub>4</sub> | Resin      | Baishitun mountain, Yili state, Xinjiang Uygur Autonomous, China | [39] |
|                                                      | -        | -                                              | Resin      | Xinjiang, China                                                  | [25] |
| (3'S, 4'S, 5'R, 8'S, 9'S, 10'S)-Kamolol acetate (27) | 426.24   | C <sub>26</sub> H <sub>34</sub> O <sub>5</sub> | Resin      | Xinjiang, China                                                  | [25] |
| Ferusingensine H (28)                                | 382.21   | C <sub>24</sub> H <sub>30</sub> O <sub>4</sub> | Resin      | Xinjiang, China                                                  | [25] |
| Monocyclic sesquiterpene coumarins                   |          |                                                |            |                                                                  |      |
| Fekrynlol (29)                                       | 384.23   | C <sub>24</sub> H <sub>32</sub> O <sub>4</sub> | Roots      | Xinjiang, China                                                  | [19] |
|                                                      | -        | -                                              | Seeds      | Yili state, Xinjiang Uygur Autonomous Region, China              | [50] |
|                                                      | -        | -                                              | Resin      | Xinjiang, China                                                  | [25] |
|                                                      | -        | -                                              | Resin      | Baishitun mountain, Yili state, Xinjiang Uygur Autonomous, China | [39] |
| Fekrynlol acetate (30)                               | 426.24   | C <sub>26</sub> H <sub>34</sub> O <sub>5</sub> | Resin      | Xinjiang, China                                                  | [25] |
|                                                      | -        | -                                              | Resin      | Baishitun mountain, Yili state, Xinjiang Uygur Autonomous, China | [39] |
| (8'S, 9'S, 10'S)-Propionyl fekrynlol (31)            | 440.25   | C <sub>27</sub> H <sub>36</sub> O <sub>5</sub> | Resin      | Xinjiang, China                                                  | [25] |
| Galbanic acid (32)                                   | 398.20   | C <sub>24</sub> H <sub>30</sub> O <sub>5</sub> | Resin      | Xinjiang Uygur Autonomous Region, China                          | [14] |
| Methyl galbanate (33)                                | 412.22   | C <sub>25</sub> H <sub>32</sub> O <sub>5</sub> | Gum resin  | Xinjiang, China                                                  | [48] |
|                                                      | -        | -                                              | Resin      | Baishitun mountain, Yili state, Xinjiang Uygur Autonomous, China | [39] |
| Fekolone (34)                                        | 380.19   | C <sub>24</sub> H <sub>28</sub> O <sub>4</sub> | Roots      | Xinjiang, China                                                  | [19] |
|                                                      | -        | -                                              | Seeds      | Yili state, Xinjiang Uygur Autonomous Region, China              | [50] |
| Sinkianone (35)                                      | 382.21   | C <sub>24</sub> H <sub>30</sub> O <sub>4</sub> | Roots      | Xinjiang Uygur Autonomous Region, China,                         | [30] |

| Compound Name/Chemical class      | Mol. Wt. | Mol. Formula                                   | Plant part | Location/Source                                                  | Ref. |
|-----------------------------------|----------|------------------------------------------------|------------|------------------------------------------------------------------|------|
|                                   | -        | -                                              | Seeds      | Yili state, Xinjiang Uygur Autonomous Region, China              | [50] |
| (3`R, 5`R, 10`R)-Sinkianol B (36) | 400.22   | C <sub>24</sub> H <sub>32</sub> O <sub>5</sub> | Gum resin  | Xinjiang, China                                                  | [48] |
| Fekrol (37)                       | 400.22   | C <sub>24</sub> H <sub>32</sub> O <sub>5</sub> | Resin      | Baishitun mountain, Yili state, Xinjiang Uygur Autonomous, China | [39] |
| Ferusingensine G (38)             | 396.19   | C <sub>24</sub> H <sub>28</sub> O <sub>5</sub> | Resin      | Xinjiang, China                                                  | [25] |
| Farnesiferol B (39)               | 382.21   | C <sub>24</sub> H <sub>30</sub> O <sub>4</sub> | Roots      | Xinjiang, China                                                  | [19] |
|                                   | -        | -                                              | Resin      | Xinjiang Uygur Autonomous Region, China                          | [14] |
|                                   | -        | -                                              | Resin      | Baishitun mountain, Yili state, Xinjiang Uygur Autonomous, China | [39] |
| Farnesiferone B (40)              | 380.18   | C <sub>24</sub> H <sub>28</sub> O <sub>4</sub> | Resin      | Xinjiang, China                                                  | [25] |
| Farnesiferol C (41)               | 382.21   | C <sub>24</sub> H <sub>30</sub> O <sub>4</sub> | Roots      | Xinjiang, China                                                  | [19] |
|                                   | -        | -                                              | Resin      | Xinjiang Uygur Autonomous Region, China                          | [14] |
|                                   | -        | -                                              | Seeds      | Yili state, Xinjiang Uygur Autonomous Region, China              | [50] |
|                                   | -        | -                                              | Resin      | Baishitun mountain, Yili state, Xinjiang Uygur Autonomous, China | [39] |
|                                   | -        | -                                              | Resin      | Xinjiang, China                                                  | [25] |
| Sinkiangenorin F (42)             | 400.22   | C <sub>24</sub> H <sub>32</sub> O <sub>5</sub> | Seeds      | Yili state, Xinjiang Uygur Autonomous Region, China              | [51] |
| 8-O-Acetyl sinkiangenorin F (43)  | 442.23   | C <sub>25</sub> H <sub>34</sub> O <sub>6</sub> | Seeds      | Yili state, Xinjiang Uygur Autonomous Region, China              | [51] |
| Sinkiangenorin D (44)             | 384.23   | C <sub>24</sub> H <sub>32</sub> O <sub>4</sub> | Seeds      | Yili state, Xinjiang Uygur Autonomous Region, China              | [50] |
| Sinkiangenorin E (45)             | 400.22   | C <sub>24</sub> H <sub>32</sub> O <sub>5</sub> | Seeds      | Yili state, Xinjiang Uygur Autonomous Region, China              | [52] |
| Ferusingensine F (46)             | 536.35   | C <sub>34</sub> H <sub>48</sub> O <sub>5</sub> | Resin      | Xinjiang, China                                                  | [25] |
| Sinkiangenol C (47)               | 398.20   | C <sub>24</sub> H <sub>30</sub> O <sub>5</sub> | Resin      | Baishitun mountain, Yili state, Xinjiang Uygur Autonomous, China | [39] |

| Compound Name/Chemical class                                                                                             | Mol. Wt. | Mol. Formula                                   | Plant part | Location/Source                                                              | Ref.      |
|--------------------------------------------------------------------------------------------------------------------------|----------|------------------------------------------------|------------|------------------------------------------------------------------------------|-----------|
| 2,3-Dihydro-7-hydroxy-2R*,3S*-dimethyl-2-[4-methyl-5-(4-methyl-2-furyl)-3(E)-pentenyl]-furo[3,2-c]coumarin ( <b>48</b> ) | 394.17   | C <sub>24</sub> H <sub>26</sub> O <sub>5</sub> | Resin      | Baishitun mountain, Yili state, Xinjiang Uygur Autonomous, China             | [39]      |
| 2,3-Dihydro-7-hydroxy-2R*,3R*-dimethyl-2-[4-methyl-5-(4-methyl-2-furyl)-3(E)-pentenyl]-furo[3,2-c]coumarin ( <b>49</b> ) | 394.17   | C <sub>24</sub> H <sub>26</sub> O <sub>5</sub> | Resin      | Baishitun mountain, Yili state, Xinjiang Uygur Autonomous, China             | [39]      |
| 2,3-Dihydro-7-hydroxy-2S,3R-dimethyl-2-[4,8-dimethyl-3(E),7-nonadienyl]-furo[3,2-c]coumarin ( <b>50</b> )                | 382.21   | C <sub>24</sub> H <sub>30</sub> O <sub>4</sub> | Roots      | China                                                                        | [40]      |
| 2,3-Dihydro-7-hydroxy-2R,3R-dimethyl-2-[4,8-dimethyl-3(E),7-nonadienyl]-furo[3,2-c]coumarin ( <b>51</b> )                | 382.21   | C <sub>24</sub> H <sub>30</sub> O <sub>4</sub> | Roots      | China                                                                        | [40]      |
| Acyclic sesquiterpene coumarins                                                                                          |          |                                                |            |                                                                              |           |
| Umbelliprenin ( <b>52</b> )                                                                                              | 366.21   | C <sub>24</sub> H <sub>30</sub> O <sub>3</sub> | Resin      | Xinjiang Uygur Autonomous Region, China                                      | [14]      |
|                                                                                                                          | -        | -                                              | Seeds      | Yili state, Xinjiang Uygur Autonomous Region, China                          | [50] [24] |
|                                                                                                                          | -        | -                                              | Resin      | Xinjiang, China                                                              | [25]      |
|                                                                                                                          | -        | -                                              | Resin      | Baishitun mountain, Yili state, Xinjiang Uygur Autonomous, China             | [39]      |
| 10R-Karatavicinol ( <b>53</b> )                                                                                          | 400.22   | C <sub>24</sub> H <sub>32</sub> O <sub>5</sub> | Resin      | Xinjiang Uygur Autonomous Region, China                                      | [14]      |
|                                                                                                                          | -        | -                                              | Resin      | Baishitun mountain, Yili state, Xinjiang Uygur Autonomous, China             | [39]      |
| 12'-Hydroxy-karatavicinol ( <b>54</b> )                                                                                  | 416.21   | C <sub>24</sub> H <sub>32</sub> O <sub>6</sub> | Resin      | Baishitun mountain, Yili state, Xinjiang Uygur Autonomous, China             | [39]      |
| Karatavicinol A ( <b>55</b> )                                                                                            | 440.25   | C <sub>27</sub> H <sub>36</sub> O <sub>5</sub> | Resin      | Xinjiang Uygur Autonomous Region, China                                      | [14]      |
| Ferusingensine A ( <b>56</b> )                                                                                           | 426.24   | C <sub>26</sub> H <sub>34</sub> O <sub>5</sub> | Resin      | Xinjiang, China                                                              | [25]      |
| Ferusingensine B ( <b>57</b> )                                                                                           | 384.23   | C <sub>24</sub> H <sub>32</sub> O <sub>4</sub> | Resin      | Xinjiang, China                                                              | [25]      |
| Ferusingensine C ( <b>58</b> )                                                                                           | 550.36   | C <sub>35</sub> H <sub>50</sub> O <sub>5</sub> | Resin      | Xinjiang, China                                                              | [25]      |
| Ferusingensine D ( <b>59</b> )                                                                                           | 536.35   | C <sub>34</sub> H <sub>48</sub> O <sub>5</sub> | Resin      | Xinjiang, China                                                              | [25]      |
| Ferusingensine E ( <b>60</b> )                                                                                           | 382.21   | C <sub>24</sub> H <sub>30</sub> O <sub>4</sub> | Resin      | Xinjiang, China                                                              | [25]      |
| Sesquiterpene chromones                                                                                                  |          |                                                |            |                                                                              |           |
| (+)-Ferulasin 2R, 3R, 10'R ( <b>61</b> )                                                                                 | 398.20   | C <sub>24</sub> H <sub>30</sub> O <sub>5</sub> | Roots      | Purchased from the Yellow River medicinal materials market of Lanzhou, China | [40]      |

| Compound Name/Chemical class                                                                                | Mol. Wt. | Mol. Formula                                   | Plant part   | Location/Source                                                              | Ref. |
|-------------------------------------------------------------------------------------------------------------|----------|------------------------------------------------|--------------|------------------------------------------------------------------------------|------|
| (-)-Ferulasin 2S, 3S, 10'S (62)                                                                             | 398.20   | C <sub>24</sub> H <sub>30</sub> O <sub>5</sub> | Roots        | Purchased from the Yellow River medicinal materials market of Lanzhou, China | [40] |
| Acyclic monoterpene coumarins                                                                               |          |                                                |              |                                                                              |      |
| Ferusinkin A (63)                                                                                           | 330.14   | C <sub>19</sub> H <sub>22</sub> O <sub>5</sub> | Aerial parts | Yili state, Xinjiang Uygur Autonomous Region, China                          | [41] |
| Diversin (64)                                                                                               | 312.13   | C <sub>19</sub> H <sub>20</sub> O <sub>4</sub> | Aerial parts | Yili state, Xinjiang Uygur Autonomous Region, China                          | [41] |
| Auraptene (65)                                                                                              | 312.13   | C <sub>19</sub> H <sub>20</sub> O <sub>4</sub> | Aerial parts | Yili state, Xinjiang Uygur Autonomous Region, China                          | [41] |
| Coumarins                                                                                                   |          |                                                |              |                                                                              |      |
| Umbelliferone (66)                                                                                          | 162.03   | C <sub>9</sub> H <sub>6</sub> O <sub>3</sub>   | Roots        | Xinjiang, China                                                              | [19] |
|                                                                                                             | -        | -                                              | Resin        | Xinjiang Uygur Autonomous Region, China                                      | [14] |
|                                                                                                             | -        | -                                              | Seeds        | Xinjiang, China                                                              | [27] |
| Herniarin (67)                                                                                              | 176.04   | C <sub>10</sub> H <sub>8</sub> O <sub>3</sub>  | Aerial parts | Yili state, Xinjiang Uygur Autonomous Region, China                          | [41] |
| Sinkiangenol F (68)                                                                                         | 312.09   | C <sub>18</sub> H <sub>16</sub> O <sub>5</sub> | Resin        | Baishitun mountain, Yili state, Xinjiang Uygur Autonomous, China             | [39] |
| Sesquiterpene phenylpropanoids                                                                              |          |                                                |              |                                                                              |      |
| Sinkiangenone A (69)                                                                                        | 576.30   | C <sub>35</sub> H <sub>44</sub> O <sub>7</sub> | Resin        | Yili state, Xinjiang Uygur Autonomous Region, China                          | [29] |
| Sinkiangenone B (70)                                                                                        | 576.30   | C <sub>35</sub> H <sub>44</sub> O <sub>7</sub> | Resin        | Yili state, Xinjiang Uygur Autonomous Region, China                          | [29] |
| Ferulaeone A (71)                                                                                           | 414.24   | C <sub>25</sub> H <sub>34</sub> O <sub>5</sub> | Roots        | China                                                                        | [43] |
| Ferulaeone G (72)                                                                                           | 518.30   | C <sub>33</sub> H <sub>42</sub> O <sub>5</sub> | Resin        | Yili state, Xinjiang Uygur Autonomous Region, China                          | [29] |
| Dshamirone (73)                                                                                             | 356.23   | C <sub>23</sub> H <sub>32</sub> O <sub>3</sub> | Roots        | China                                                                        | [40] |
| 1-(2,4-Dihydroxyphenyl)-2-hydroxy-5,9,13-trimethyl-4(E),8(E),12-tetradecatrien-1-one (74)                   | 372.23   | C <sub>23</sub> H <sub>32</sub> O <sub>4</sub> | Roots        | China                                                                        | [40] |
| 3S-(2,4-Dihydroxybenzoyl)-4R,5R-dimethyl-5-(4,8-dimethyl-3(E),7(E)-nonadien-1-yl)tetrahydro-2-furanone (75) | 400.22   | C <sub>24</sub> H <sub>32</sub> O <sub>5</sub> | Roots        | China                                                                        | [40] |

| Compound Name/Chemical class                                         | Mol. Wt. | Mol. Formula                                   | Plant part | Location/Source                                                   | Ref. |
|----------------------------------------------------------------------|----------|------------------------------------------------|------------|-------------------------------------------------------------------|------|
| Fukanedone B (76)                                                    | 400.22   | C <sub>24</sub> H <sub>32</sub> O <sub>5</sub> | Roots      | China                                                             | [40] |
| Lignans                                                              |          |                                                |            |                                                                   |      |
| Arctigenin (77)                                                      | 372.15   | C <sub>21</sub> H <sub>24</sub> O <sub>6</sub> | Seeds      | Yili state, Xinjiang Uygur Autonomous Region, China               | [17] |
|                                                                      | -        | -                                              | Seeds      | Yili state, Xinjiang Uygur Autonomous Region, China               | [24] |
| Matairesinol (78)                                                    | 420.21   | C <sub>20</sub> H <sub>22</sub> O <sub>6</sub> | Seeds      | Yili state, Xinjiang Uygur Autonomous Region, China               | [17] |
| Secroisolariciresinol (79)                                           | 362.17   | C <sub>20</sub> H <sub>26</sub> O <sub>6</sub> | Seeds      | Yili state, Xinjiang Uygur Autonomous Region, China               | [17] |
|                                                                      | -        | -                                              | Seeds      | Xinjiang, China                                                   | [27] |
| Lariciresinol (80)                                                   | 360.15   | C <sub>20</sub> H <sub>24</sub> O <sub>6</sub> | Seeds      | Yili state, Xinjiang Uygur Autonomous Region, China               | [17] |
|                                                                      | -        | -                                              | Seeds      | Yili state, Xinjiang Uygur Autonomous Region, China               | [24] |
|                                                                      | -        | -                                              | Seeds      | Xinjiang, China                                                   | [27] |
| (7,8-cis-8,8'-trans)-2-4-Dihydroxyl-3,5-dimethoxy-lariciresinol (81) | 360.15   | C <sub>20</sub> H <sub>24</sub> O <sub>6</sub> | Seeds      | Yili state, Xinjiang Uygur Autonomous Region, China               | [24] |
| (+)-Ferulasinkin A (82)<br>(7R, 8R, 7'R, 8'R)                        | 362.13   | C <sub>19</sub> H <sub>22</sub> O <sub>7</sub> | Resin      | Purchased from Huangyadai Pharmaceutical Co., Ltd., Yunnan, China | [35] |
| (-)-Ferulasinkin A (83)<br>(7S, 8S, 7'S, 8'S)                        | 362.13   | C <sub>19</sub> H <sub>22</sub> O <sub>7</sub> | Resin      | Purchased from Huangyadai Pharmaceutical Co., Ltd., Yunnan, China | [35] |
| (+)-Ferulasinkin B (84)<br>(7S, 8S, 7'R, 8'R)                        | 362.13   | C <sub>19</sub> H <sub>22</sub> O <sub>7</sub> | Resin      | Purchased from Huangyadai Pharmaceutical Co., Ltd., Yunnan, China | [35] |
| (-)-Ferulasinkin B (85)<br>(7R, 8R, 7'S, 8'S)                        | 362.13   | C <sub>19</sub> H <sub>22</sub> O <sub>7</sub> | Resin      | Purchased from Huangyadai Pharmaceutical Co., Ltd., Yunnan, China | [35] |
| (+)-Ferulasinkin C (86)<br>(7S, 8S, 7'R, 8'R)                        | 362.13   | C <sub>19</sub> H <sub>22</sub> O <sub>7</sub> | Resin      | Purchased from Huangyadai Pharmaceutical Co., Ltd., Yunnan, China | [35] |
| (-)-Ferulasinkin C (87)<br>(7R, 8R, 7'S, 8'R)                        | 362.13   | C <sub>19</sub> H <sub>22</sub> O <sub>7</sub> | Resin      | Purchased from Huangyadai Pharmaceutical Co., Ltd., Yunnan, China | [35] |

| Compound Name/Chemical class                    | Mol. Wt. | Mol. Formula                                    | Plant part | Location/Source                                                   | Ref. |
|-------------------------------------------------|----------|-------------------------------------------------|------------|-------------------------------------------------------------------|------|
| (+)-Ferulasinkin D (88)<br>(7R, 8S, 7'S, 8'S)   | 362.13   | C <sub>19</sub> H <sub>22</sub> O <sub>7</sub>  | Resin      | Purchased from Huangyadai Pharmaceutical Co., Ltd., Yunnan, China | [35] |
| (-)-Ferulasinkin D (89)<br>(7S, 8R, 7'R, 8'R)   | 362.13   | C <sub>19</sub> H <sub>22</sub> O <sub>7</sub>  | Resin      | Purchased from Huangyadai Pharmaceutical Co., Ltd., Yunnan, China | [35] |
| (+)-Sinkianlignan A (90)<br>(7'S, 8'R)          | 518.18   | C <sub>30</sub> H <sub>30</sub> O <sub>8</sub>  | Resin      | Kashgar, Xinjiang Uyghur Autonomous Region, China                 | [44] |
| (-)-Sinkianlignan A (91)<br>(7'R, 8'S)          | 518.19   | C <sub>30</sub> H <sub>30</sub> O <sub>8</sub>  | Resin      | Kashgar, Xinjiang Uyghur Autonomous Region, China                 | [44] |
| (+)-Sinkianlignan B (92)<br>(7S, 8S, 7'S, 8'R)  | 552.19   | C <sub>30</sub> H <sub>32</sub> O <sub>10</sub> | Resin      | Kashgar, Xinjiang Uyghur Autonomous Region, China                 | [44] |
| (-)-Sinkianlignan B (93)<br>(7R, 8R, 7'R, 8'S)  | 552.19   | C <sub>30</sub> H <sub>32</sub> O <sub>10</sub> | Resin      | Kashgar, Xinjiang Uyghur Autonomous Region, China                 | [44] |
| (+)-Sinkianlignan C (94)<br>(7R, 8R, 9S, 7'R)   | 524.24   | C <sub>30</sub> H <sub>36</sub> O <sub>8</sub>  | Resin      | Kashgar, Xinjiang Uyghur Autonomous Region, China                 | [44] |
| (-)-Sinkianlignan C (95)<br>(7S, 8S, 9R, 7'S)   | 524.24   | C <sub>30</sub> H <sub>36</sub> O <sub>8</sub>  | Resin      | Kashgar, Xinjiang Uyghur Autonomous Region, China                 | [44] |
| (+)-Sinkianlignan D (96)<br>(7S, 8R, 9'S)       | 430.16   | C <sub>23</sub> H <sub>26</sub> O <sub>8</sub>  | Resin      | Kashgar, Xinjiang Uyghur Autonomous Region, China                 | [44] |
| (-)-Sinkianlignan D (97)<br>(7R, 8S, 9'R)       | 430.16   | C <sub>23</sub> H <sub>26</sub> O <sub>8</sub>  | Resin      | Kashgar, Xinjiang Uyghur Autonomous Region, China                 | [44] |
| (+)-Sinkianlignan E (98)<br>(7S, 8S)            | 358.17   | C <sub>21</sub> H <sub>26</sub> O <sub>5</sub>  | Resin      | Kashgar, Xinjiang Uyghur Autonomous Region, China                 | [44] |
| (-)-Sinkianlignan E (99)<br>(7R, 8R)            | 358.17   | C <sub>21</sub> H <sub>26</sub> O <sub>5</sub>  | Resin      | Kashgar, Xinjiang Uyghur Autonomous Region, China                 | [44] |
| (+)-Sinkianlignan F (100)<br>(7R, 8S)           | 358.17   | C <sub>21</sub> H <sub>26</sub> O <sub>5</sub>  | Resin      | Kashgar, Xinjiang Uyghur Autonomous Region, China                 | [44] |
| (-)-Sinkianlignan F (101)<br>(7S, 8R)           | 358.17   | C <sub>21</sub> H <sub>26</sub> O <sub>5</sub>  | Resin      | Kashgar, Xinjiang Uyghur Autonomous Region, China                 | [44] |
| (+)-Sinkianlignan G (102)<br>(7R, 8S, 7'R, 8'S) | 376.15   | C <sub>20</sub> H <sub>24</sub> O <sub>7</sub>  | Resin      | Kashgar, Xinjiang Uyghur Autonomous Region, China                 | [18] |

| Compound Name/Chemical class                             | Mol. Wt. | Mol. Formula                                    | Plant part     | Location/Source                                   | Ref. |
|----------------------------------------------------------|----------|-------------------------------------------------|----------------|---------------------------------------------------|------|
| (-)-Sinkianlignan G ( <b>103</b> )<br>(7S, 8R, 7'S, 8'R) | 376.15   | C <sub>20</sub> H <sub>24</sub> O <sub>7</sub>  | Resin          | Kashgar, Xinjiang Uyghur Autonomous Region, China | [18] |
| (+)-Sinkianlignan H ( <b>104</b> )<br>(7S, 8R, 7'R, 8'R) | 376.15   | C <sub>20</sub> H <sub>24</sub> O <sub>7</sub>  | Resin          | Kashgar, Xinjiang Uyghur Autonomous Region, China | [18] |
| (-)-Sinkianlignan H ( <b>105</b> )<br>(7R, 8S, 7'S, 8'S) | 376.15   | C <sub>20</sub> H <sub>24</sub> O <sub>7</sub>  | Resin          | Kashgar, Xinjiang Uyghur Autonomous Region, China | [18] |
| (+)-Sinkianlignan I ( <b>106</b> )<br>(7R, 8R, 7'S, 8'S) | 376.15   | C <sub>20</sub> H <sub>24</sub> O <sub>7</sub>  | Resin          | Kashgar, Xinjiang Uyghur Autonomous Region, China | [18] |
| (-)-Sinkianlignan I ( <b>107</b> )<br>(7S, 8S, 7'R, 8'R) | 376.15   | C <sub>20</sub> H <sub>24</sub> O <sub>7</sub>  | Resin          | Kashgar, Xinjiang Uyghur Autonomous Region, China | [18] |
| (+)-Sinkianlignan J ( <b>108</b> )<br>(7R, 8R, 7'R, 8'R) | 376.15   | C <sub>20</sub> H <sub>24</sub> O <sub>7</sub>  | Resin          | Kashgar, Xinjiang Uyghur Autonomous Region, China | [18] |
| (-)-Sinkianlignan J ( <b>109</b> )<br>(7S, 8S, 7'S, 8'S) | 376.15   | C <sub>20</sub> H <sub>24</sub> O <sub>7</sub>  | Resin          | Kashgar, Xinjiang Uyghur Autonomous Region, China | [18] |
| (+)-Sinkianlignan K ( <b>110</b> )<br>(7R, 8S, 7'S, 8'R) | 376.15   | C <sub>20</sub> H <sub>24</sub> O <sub>7</sub>  | Resin          | Kashgar, Xinjiang Uyghur Autonomous Region, China | [18] |
| (-)-Sinkianlignan K ( <b>111</b> )<br>(7S, 8S, 7'R, 8'S) | 376.15   | C <sub>20</sub> H <sub>24</sub> O <sub>7</sub>  | Resin          | Kashgar, Xinjiang Uyghur Autonomous Region, China | [18] |
| Neoarctiin A ( <b>112</b> )                              | 742.29   | C <sub>42</sub> H <sub>46</sub> O <sub>12</sub> | Seeds          | Xinjiang, China                                   | [27] |
| Pinoresinol ( <b>113</b> )                               | 358.14   | C <sub>20</sub> H <sub>22</sub> O <sub>6</sub>  | Seeds          | Xinjiang, China                                   | [27] |
| Arctiin ( <b>114</b> )                                   | 534.21   | C <sub>27</sub> H <sub>34</sub> O <sub>11</sub> | Seeds          | Xinjiang, China                                   | [27] |
| Monoterpenes                                             |          |                                                 |                |                                                   |      |
| Carene ( <b>115</b> )                                    | 136.12   | C <sub>10</sub> H <sub>16</sub>                 | Oleo-gum resin | Xinjiang, China                                   | [8]  |
| Camphene ( <b>116</b> )                                  | 136.12   | C <sub>10</sub> H <sub>16</sub>                 | Oleo-gum resin | Xinjiang, China                                   | [8]  |
| β-Pinene ( <b>117</b> )                                  | 136.12   | C <sub>10</sub> H <sub>16</sub>                 | Oleo-gum resin | Xinjiang, China                                   | [8]  |
| α- Pinene ( <b>118</b> )                                 | 136.12   | C <sub>10</sub> H <sub>16</sub>                 | Oleo-gum resin | Xinjiang, China                                   | [8]  |

| Compound Name/Chemical class                                 | Mol. Wt. | Mol. Formula                                   | Plant part     | Location/Source                                     | Ref. |
|--------------------------------------------------------------|----------|------------------------------------------------|----------------|-----------------------------------------------------|------|
| p-Cymene ( <b>119</b> )                                      | 134.10   | C <sub>10</sub> H <sub>14</sub>                | Oleo-gum resin | Xinjiang, China                                     | [8]  |
| Sesquiterpenes                                               |          |                                                |                |                                                     |      |
| Nerolidol ( <b>120</b> )                                     | 222.19   | C <sub>15</sub> H <sub>26</sub> O              | Aerial parts   | Yili state, Xinjiang Uygur Autonomous Region, China | [41] |
| (3S,E)-Nerolidol ( <b>121</b> )                              | 222.19   | C <sub>15</sub> H <sub>26</sub> O              | Roots          | China                                               | [40] |
| Guaiol ( <b>122</b> )                                        | 222.19   | C <sub>15</sub> H <sub>26</sub> O              | Aerial parts   | Yili state, Xinjiang Uygur Autonomous Region, China | [41] |
|                                                              | -        | -                                              | Roots          | China                                               | [40] |
| Brevifolliol ( <b>123</b> )                                  | 556.26   | C <sub>31</sub> H <sub>40</sub> O <sub>9</sub> | Seeds          | Xinjiang, China                                     | [27] |
| Fercoperol ( <b>124</b> )                                    | 270.18   | C <sub>15</sub> H <sub>26</sub> O <sub>4</sub> | Roots          | China                                               | [40] |
| iso-Fercoperol ( <b>125</b> )                                | 270.18   | C <sub>15</sub> H <sub>26</sub> O <sub>4</sub> | Roots          | China                                               | [40] |
| Sulfanes                                                     |          |                                                |                |                                                     |      |
| 1-(sec-Butyl)-2-methyldisulfane ( <b>126</b> )               | 136.03   | C <sub>5</sub> H <sub>12</sub> S <sub>2</sub>  | Oleo-gum resin | Xinjiang, China                                     | [8]  |
| 1-(sec-Butyl)-2-ethyldisulfane ( <b>127</b> )                | 150.05   | C <sub>6</sub> H <sub>14</sub> S <sub>2</sub>  | Oleo-gum resin | Xinjiang, China                                     | [8]  |
| 1-(sec-Butyl)-2-vinyldisulfane ( <b>128</b> )                | 148.03   | C <sub>6</sub> H <sub>12</sub> S <sub>2</sub>  | Oleo-gum resin | Xinjiang, China                                     | [8]  |
| 1-Butyl-2-ethyldisulfane ( <b>129</b> )                      | 150.05   | C <sub>6</sub> H <sub>14</sub> S <sub>2</sub>  | Oleo-gum resin | Xinjiang, China                                     | [8]  |
| 1,3-Dimethyltrisulfane ( <b>130</b> )                        | 125.96   | C <sub>2</sub> H <sub>6</sub> S <sub>3</sub>   | Oleo-gum resin | Xinjiang, China                                     | [8]  |
| 1-(sec-Butyl)-2-isopropyldisulfane ( <b>131</b> )            | 164.06   | C <sub>7</sub> H <sub>16</sub> S <sub>2</sub>  | Oleo-gum resin | Xinjiang, China                                     | [8]  |
| 1,2-di-sec-Butyldisulfane ( <b>132</b> )                     | 178.08   | C <sub>8</sub> H <sub>18</sub> S <sub>2</sub>  | Oleo-gum resin | Xinjiang, China                                     | [8]  |
| (Z)-1-(sec-Butyl)-2-(prop-1-en-1-yl)disulfane ( <b>133</b> ) | 162.05   | C <sub>7</sub> H <sub>14</sub> S <sub>2</sub>  | Oleo-gum resin | Xinjiang, China                                     | [8]  |
|                                                              | -        | -                                              | Resin          | Xin Jiang, China                                    | [60] |

| Compound Name/Chemical class                                                     | Mol. Wt. | Mol. Formula                                  | Plant part     | Location/Source  | Ref. |
|----------------------------------------------------------------------------------|----------|-----------------------------------------------|----------------|------------------|------|
| (Z)-1-(But-1-en-1-yl)-2-(sec-butyl)disulfane ( <b>134</b> )                      | 176.06   | C <sub>8</sub> H <sub>16</sub> S <sub>2</sub> | Oleo-gum resin | Xinjiang, China  | [8]  |
| (E)-1-(But-1-en-1-yl)-2-(sec-butyl)disulfane ( <b>135</b> )                      | 176.06   | C <sub>8</sub> H <sub>16</sub> S <sub>2</sub> | Oleo-gum resin | Xinjiang, China  | [8]  |
|                                                                                  | -        | -                                             | Resin          | Xin Jiang, China | [60] |
| 1,3-di-sec-Butyltrisulfane ( <b>136</b> )                                        | 210.05   | C <sub>8</sub> H <sub>18</sub> S <sub>3</sub> | Oleo-gum resin | Xinjiang, China  | [8]  |
| (E)-1-(sec-Butyl)-3-(prop-1-en-1-yl)trisulfane ( <b>137</b> )                    | 194.02   | C <sub>7</sub> H <sub>14</sub> S <sub>3</sub> | Oleo-gum resin | Xinjiang, China  | [8]  |
| 1-(2-(Isopropylthio)ethyl)-2-methyldisulfane ( <b>138</b> )                      | 182.02   | C <sub>6</sub> H <sub>14</sub> S <sub>3</sub> | Oleo-gum resin | Xinjiang, China  | [8]  |
| 1-(3-(Isopropylthio)propyl)-2-methyldisulfane ( <b>139</b> )                     | 196.04   | C <sub>7</sub> H <sub>16</sub> S <sub>3</sub> | Oleo-gum resin | Xinjiang, China  | [8]  |
| (Z)-1-(3-(Isopropylthio)prop-1-en-1-yl)-2-methyldisulfane ( <b>140</b> )         | 194.02   | C <sub>7</sub> H <sub>14</sub> S <sub>3</sub> | Oleo-gum resin | Xinjiang, China  | [8]  |
| (E)-1-(2-(Isopropylthio)vinyl)-2-methyldisulfane ( <b>141</b> )                  | 180.01   | C <sub>6</sub> H <sub>12</sub> S <sub>3</sub> | Oleo-gum resin | Xinjiang, China  | [8]  |
| 1-(2-(sec-Butylthio)ethyl)-2-methyldisulfane ( <b>142</b> )                      | 196.04   | C <sub>7</sub> H <sub>16</sub> S <sub>3</sub> | Oleo-gum resin | Xinjiang, China  | [8]  |
| 1-(3-(sec-Butylthio)propyl)-2-methyldisulfane ( <b>143</b> )                     | 210.05   | C <sub>8</sub> H <sub>18</sub> S <sub>3</sub> | Oleo-gum resin | Xinjiang, China  | [8]  |
| (E)-1-Methyl-2-(2-(propylthio)vinyl)disulfane ( <b>144</b> )                     | 180.01   | C <sub>6</sub> H <sub>12</sub> S <sub>3</sub> | Oleo-gum resin | Xinjiang, China  | [8]  |
| (Z)-1-(3-(sec-Butylthio)prop-1-en-1-yl)-2-methyldisulfane ( <b>145</b> )         | 208.04   | C <sub>8</sub> H <sub>16</sub> S <sub>3</sub> | Oleo-gum resin | Xinjiang, China  | [8]  |
| (Z)-1-(2-(sec-butylthio)vinyl)-2-methyldisulfane ( <b>146</b> )                  | 194.02   | C <sub>7</sub> H <sub>14</sub> S <sub>3</sub> | Oleo-gum resin | Xinjiang, China  | [8]  |
| 1-Methyl-2-((E)-2-(((E)-prop-1-en-1-yl)disulfanyl)vinyl)disulfane ( <b>147</b> ) | 209.96   | C <sub>6</sub> H <sub>10</sub> S <sub>4</sub> | Oleo-gum resin | Xinjiang, China  | [8]  |
| Steroids                                                                         |          |                                               |                |                  |      |

| Compound Name/Chemical class             | Mol. Wt. | Mol. Formula                                    | Plant part   | Location/Source                                     | Ref. |
|------------------------------------------|----------|-------------------------------------------------|--------------|-----------------------------------------------------|------|
| Sinkiangenrin A (148)                    | 420.21   | C <sub>23</sub> H <sub>32</sub> O <sub>7</sub>  | Seeds        | Yili state, Xinjiang Uygur Autonomous Region, China | [17] |
| Sinkiangenrin B (149)                    | 418.19   | C <sub>23</sub> H <sub>30</sub> O <sub>7</sub>  | Seeds        | Yili state, Xinjiang Uygur Autonomous Region, China | [17] |
| β-Sitosterol (150)                       | 414.38   | C <sub>29</sub> H <sub>50</sub> O               | Seeds        | Xinjiang, China                                     | [27] |
| Stigmasterol (151)                       | 412.37   | C <sub>29</sub> H <sub>48</sub> O               | Seeds        | Xinjiang, China                                     | [27] |
| Daucosterol (152)                        | 576.43   | C <sub>35</sub> H <sub>60</sub> O <sub>6</sub>  | Seeds        | Xinjiang, China                                     | [27] |
| Stigmasterol-3-O-β-D-glucoside (153)     | 574.42   | C <sub>35</sub> H <sub>58</sub> O <sub>6</sub>  | Seeds        | Xinjiang, China                                     | [27] |
| Phenolic compounds                       |          |                                                 |              |                                                     |      |
| Quercetin (154)                          | 302.04   | C <sub>15</sub> H <sub>10</sub> O <sub>7</sub>  | Seeds        | Yili state, Xinjiang Uygur Autonomous Region, China | [24] |
| Isoquercitrin (155)                      | 464.09   | C <sub>21</sub> H <sub>20</sub> O <sub>12</sub> | Seeds        | Xinjiang, China                                     | [27] |
| Rutin (156)                              | 610.15   | C <sub>27</sub> H <sub>30</sub> O <sub>16</sub> | Seeds        | Xinjiang, China                                     | [27] |
| Luteolin-7-O-β-D-glucuronide (157)       | 462.07   | C <sub>21</sub> H <sub>18</sub> O <sub>12</sub> | Seeds        | Xinjiang, China                                     | [27] |
| Ferulic acid (158)                       | 194.05   | C <sub>10</sub> H <sub>10</sub> O <sub>4</sub>  | Seeds        | Xinjiang, China                                     | [27] |
|                                          |          |                                                 | Resin        | Yili state, Xinjiang Uygur Autonomous Region, China | [29] |
|                                          | -        | -                                               | Aerial parts | Yili state, Xinjiang Uygur Autonomous Region, China | [41] |
|                                          | -        | -                                               | Resin        | Kashgar, Xinjiang Uyghur Autonomous Region, China   | [18] |
| Caffeic acid (159)                       | 180.04   | C <sub>9</sub> H <sub>8</sub> O <sub>4</sub>    | Seeds        | Xinjiang, China                                     | [27] |
| Chlorogenic acid (160)                   | 354.09   | C <sub>16</sub> H <sub>18</sub> O <sub>9</sub>  | Seeds        | Xinjiang, China                                     | [27] |
| Methyl chlorogenate (161)                | 368.11   | C <sub>17</sub> H <sub>20</sub> O <sub>9</sub>  | Seeds        | Xinjiang, China                                     | [27] |
| 1,5-di-O-Caffeoylquinic (162)            | 516.12   | C <sub>25</sub> H <sub>24</sub> O <sub>12</sub> | Seeds        | Xinjiang, China                                     | [27] |
| P-Hydroxycinnamic acid (163)             | 164.04   | C <sub>9</sub> H <sub>8</sub> O <sub>3</sub>    | Resin        | Yili state, Xinjiang Uygur Autonomous Region, China | [29] |
| 3',4'-Dimethoxy cinnamyl isovalent (164) | 278.15   | C <sub>16</sub> H <sub>22</sub> O <sub>4</sub>  | Resin        | Yili state, Xinjiang Uygur Autonomous Region, China | [29] |
| Vanillic acid (165)                      | 168.04   | C <sub>8</sub> H <sub>8</sub> O <sub>4</sub>    | Seeds        | Xinjiang, China                                     | [27] |

| Compound Name/Chemical class                                   | Mol. Wt. | Mol. Formula                                    | Plant part | Location/Source                                     | Ref. |
|----------------------------------------------------------------|----------|-------------------------------------------------|------------|-----------------------------------------------------|------|
| Vanillin ( <b>166</b> )                                        | 152.04   | C <sub>8</sub> H <sub>8</sub> O <sub>3</sub>    | Resin      | Yili state, Xinjiang Uygur Autonomous Region, China | [29] |
| Coniferaldehyde = Ferulaldehyde ( <b>167</b> )                 | 178.06   | C <sub>10</sub> H <sub>10</sub> O <sub>3</sub>  | Resin      | Yili state, Xinjiang Uygur Autonomous Region, China | [29] |
|                                                                | -        | -                                               | Resin      | Kashgar, Xinjiang Uyghur Autonomous Region, China   | [18] |
| (2E)-3-(4-Ethoxy-3-methoxyphenyl)prop-2-en-1-ol ( <b>168</b> ) | 208.10   | C <sub>12</sub> H <sub>16</sub> O <sub>3</sub>  | Resin      | Yili state, Xinjiang Uygur Autonomous Region, China | [29] |
| (7S,8R)-Guaiacyl glycerol ( <b>169</b> )                       | 214.08   | C <sub>10</sub> H <sub>14</sub> O <sub>5</sub>  | Resin      | Yili state, Xinjiang Uygur Autonomous Region, China | [29] |
| (7S,8S)-Guaiacyl glycerol ( <b>170</b> )                       | 214.08   | C <sub>10</sub> H <sub>14</sub> O <sub>5</sub>  | Resin      | Yili state, Xinjiang Uygur Autonomous Region, China | [29] |
| 3',4'-dimethoxycinnamyl alcohol ( <b>171</b> )                 | 194.09   | C <sub>11</sub> H <sub>14</sub> O <sub>3</sub>  | Resin      | Kashgar, Xinjiang Uyghur Autonomous Region, China   | [18] |
| 4-[(E)-3-ethoxyprop-1-enyl]-2-methoxy phenol ( <b>172</b> )    | 208.10   | C <sub>12</sub> H <sub>16</sub> O <sub>3</sub>  | Resin      | Kashgar, Xinjiang Uyghur Autonomous Region, China   | [18] |
| Brachangobinan E ( <b>173</b> )                                | 312.15   | C <sub>16</sub> H <sub>24</sub> O <sub>6</sub>  | Resin      | Kashgar, Xinjiang Uyghur Autonomous Region, China   | [18] |
| 4,4'-Dihydroxy-3,3'-dimethoxy-trans-stilbene ( <b>174</b> )    | 272.10   | C <sub>16</sub> H <sub>16</sub> O <sub>4</sub>  | Resin      | Yili state, Xinjiang Uygur Autonomous Region, China | [29] |
| 3,3'-Dimethoxy-4,4'-dioxychalcone ( <b>175</b> )               | 300.09   | C <sub>17</sub> H <sub>16</sub> O <sub>5</sub>  | Resin      | Kashgar, Xinjiang Uyghur Autonomous Region, China   | [18] |
| Ferulagenol A ( <b>176</b> )                                   | 290.11   | C <sub>16</sub> H <sub>18</sub> O <sub>5</sub>  | Resin      | Kashgar, Xinjiang Uyghur Autonomous Region, China   | [18] |
| 4-Hydroxy-3-methoxyphenylterulic acid ( <b>177</b> )           | 316.09   | C <sub>17</sub> H <sub>16</sub> O <sub>6</sub>  | Resin      | Kashgar, Xinjiang Uyghur Autonomous Region, China   | [18] |
| Macrathoin F ( <b>178</b> )                                    | 530.14   | C <sub>26</sub> H <sub>26</sub> O <sub>12</sub> | Seeds      | Yili state, Xinjiang Uygur Autonomous Region, China | [24] |
|                                                                | -        | -                                               | Seeds      | Xinjiang, China                                     | [27] |
| Sinkiangenone C ( <b>179</b> )                                 | 390.13   | C <sub>20</sub> H <sub>22</sub> O <sub>8</sub>  | Resin      | Yili state, Xinjiang Uygur Autonomous Region, China | [29] |

| Compound Name/Chemical class                                                             | Mol. Wt. | Mol. Formula                                                  | Plant part | Location/Source                                     | Ref. |
|------------------------------------------------------------------------------------------|----------|---------------------------------------------------------------|------------|-----------------------------------------------------|------|
| Sinkiangenone D ( <b>180</b> )                                                           | 390.13   | C <sub>20</sub> H <sub>22</sub> O <sub>8</sub>                | Resin      | Yili state, Xinjiang Uygur Autonomous Region, China | [29] |
| 3-(3,4-Dimethoxyphenyl)-2-propen-1-yl ester ( <b>181</b> )                               | 370.14   | C <sub>21</sub> H <sub>22</sub> O <sub>6</sub>                | Resin      | Yili state, Xinjiang Uygur Autonomous Region, China | [29] |
| Other metabolites                                                                        |          |                                                               |            |                                                     |      |
| Sinkiangensis A ( <b>182</b> )                                                           | 282.14   | C <sub>15</sub> H <sub>22</sub> O <sub>5</sub>                | Resin      | Yining, Xinjiang, China                             | [46] |
| Sinkiangensis B ( <b>183</b> )                                                           | 324.15   | C <sub>17</sub> H <sub>24</sub> O <sub>6</sub>                | Resin      | Yining, Xinjiang, China                             | [46] |
| Sinkiangensis C ( <b>184</b> )                                                           | 240.09   | C <sub>12</sub> H <sub>16</sub> O <sub>5</sub>                | Resin      | Yining, Xinjiang, China                             | [46] |
| 5-Hydroxymethyl fufural ( <b>185</b> )                                                   | 126.03   | C <sub>6</sub> H <sub>6</sub> O <sub>3</sub>                  | Seeds      | Xinjiang, China                                     | [27] |
| Variecolorquinone A ( <b>186</b> )                                                       | 402.09   | C <sub>20</sub> H <sub>18</sub> O <sub>9</sub>                | Seeds      | Xinjiang, China                                     | [27] |
| 1-(3-Ethylphenyl)-1,2-ethanediol ( <b>187</b> )                                          | 166.09   | C <sub>10</sub> H <sub>14</sub> O <sub>2</sub>                | Seeds      | Xinjiang, China                                     | [27] |
| Sucrose ( <b>188</b> )                                                                   | 342.11   | C <sub>12</sub> H <sub>22</sub> O <sub>11</sub>               | Seeds      | Xinjiang, China                                     | [27] |
| Inosine ( <b>189</b> )                                                                   | 268.08   | C <sub>10</sub> H <sub>12</sub> N <sub>4</sub> O <sub>5</sub> | Seeds      | Xinjiang, China                                     | [27] |
| Uridine ( <b>190</b> )                                                                   | 244.06   | C <sub>9</sub> H <sub>12</sub> N <sub>2</sub> O <sub>6</sub>  | Seeds      | Xinjiang, China                                     | [27] |
| (R)-2'-hydroxy-N-[(2S,3S,4R)-1,3,4-trihydroxyhexacosan-2-yl] nonadanamide ( <b>191</b> ) | 585.53   | C <sub>35</sub> H <sub>71</sub> NO <sub>5</sub>               | Seeds      | Xinjiang, China                                     | [27] |
| Sinkiangenrin C ( <b>192</b> )                                                           | 338.15   | C <sub>14</sub> H <sub>26</sub> O <sub>9</sub>                | Seeds      | Yili state, Xinjiang Uygur Autonomous Region, China | [17] |
| Butanedioic acid ( <b>193</b> )                                                          | 118.02   | C <sub>4</sub> H <sub>6</sub> O <sub>4</sub>                  | Seeds      | Xinjiang, China                                     | [27] |
| n-Hexacosanol ( <b>194</b> )                                                             | 382.41   | C <sub>26</sub> H <sub>54</sub> O                             | Seeds      | Xinjiang, China                                     | [27] |

## References

- [8] Zhi-da, M.; Qi-fi, M.; Mizuno, M.; Tanaka, T.; Iinuma, M. Polysulfanes in the volatile oils of *Ferula* species. *Planta Med.* **1987**, *53*, 300-302.
- [13] Sattar, Z.; Iranshahi, M. Phytochemistry and pharmacology of *Ferula hermonis* Boiss.—A review. *Drug Res.* **2017**, *67*, 437-446.
- [14] Teng, L.; Ma, G.Z.; Li, L.; Ma, L.Y.; Xu, X.Q. Karatavicinol a, a new anti-ulcer sesquiterpene coumarin from *Ferula Sinkiangensis*. *Chem. Nat. Compd.* **2013**, *49*, 606-609.
- [17] Li, G.; Li, X.; Cao, L.; Shen, L.; Zhu, J.; Zhang, J.; Wang, J.; Zhang, L.; Si, J. Steroidal esters from *Ferula sinkiangensis*. *Fitoterapia* **2014**, *97*, 247-252.
- [18] Yan, Y.; Bao, X.; Li, Y.; Li, Q.; Cheng, Y.; Jiao, Y.; Zhang, H. Racemic Norneolignans from the resin of *Ferula sinkiangensis* and their Cox-2 inhibitory activity. *Fitoterapia* **2023**, *164*, 105341.
- [19] Yang, J.; Jing, S.; Li, Z.; Qin, H. Chemical constituents from roots of *Ferula sinkiangensis*. *Zhongguo Zhong Yao Za Zhi* **2007**, *32*, 2382-2384.
- [24] Zhang, L.; Si, J.; Li, G.; Li, X.; Zhang, L.; Gao, L.; Huo, X.; Liu, D.; Sun, X.; Cao, L. Umbelliprenin and lariciresinol isolated from a long-term-used herb medicine *Ferula sinkiangensis* induce apoptosis and G0/G1 arresting in gastric cancer cells. *RSC Adv.* **2015**, *5*, 91006-91017.
- [25] Guo, T.; Zhou, D.; Yang, Y.; Zhang, X.; Chen, G.; Lin, B.; Sun, Y.; Ni, H.; Liu, J.; Hou, Y. Bioactive sesquiterpene coumarins from the resin of *Ferula sinkiangensis* targeted on over-activation of microglia. *Bioorg. Chem.* **2020**, *104*, 104338.
- [27] Li, G. Chemical constituents from seeds of *Ferula sinkiangensis*. *Chin. Tradit. Herb. Drugs.* **2015**, 1730-1736.
- [29] Wang, J.; Gao, Y.; Wang, H.; Chen, L.; Cao, L.; Xu, J.; Li, X.; Zhao, Y.; Zhu, J.; Si, J. Apoptosis induction and cell cycle arrest induced by sinkiangenone B, a novel phenylpropanoid derivative from the resin of *Ferula sinkiangensis* KM Shen. *RSC Adv.* **2018**, *8*, 4093-4103.
- [30] Yang, J.; An, Z.; Li, Z.; Jing, S.; Qina, H. Sesquiterpene coumarins from the roots of *Ferula sinkiangensis* and *Ferula teterrima*. *Chem. Pharm. Bull.* **2006**, *54*, 1595-1598.
- [35] Li, Y.; Yang, B.; Zheng, S.; Cheng, Y.; Cui, H. Racemic norlignans as diastereoisomers from *Ferula sinkiangensis* resins with antitumor and wound-healing promotion activities. *Molecules* **2022**, *27*, 3907.
- [39] Wang, J.; Wang, H.; Zhang, M.; Li, X.; Zhao, Y.; Chen, G.; Si, J.; Jiang, L. Sesquiterpene coumarins from *Ferula sinkiangensis* KM Shen and their cytotoxic activities. *Phytochemistry* **2020**, *180*, 112531.
- [40] Wang, J.; Meng, X.; Zheng, Y.; Sang, C.; Wang, W.; Ma, J.; Zhao, Y.; Yang, J. (±)-Ferulasin, unusual sesquiterpene chromones from *Ferula sinkiangensis*. *Tetrahedron* **2022**, *122*, 132953.
- [41] Liu, T.; Wang, L.; Zhang, L.; Jiang, H.; Zhang, Y.; Mao, L. Insecticidal, cytotoxic and anti-phytopathogenic fungal activities of chemical constituents from the aerial parts of *Ferula sinkiangensis*. *Nat. Prod. Res.* **2020**, *34*, 1430-1436.
- [43] Wang, J.; Zhao, Y.; Qiang, Y. Chemical constituents from *Ferula sinkiangensis* and their chemotaxonomic significance. *Biochem. Syst. Ecol.* **2022**, *105*, 104519.
- [44] Li, Q.; Li, J.; Bao, X.; Zhang, S.; Luo, Q.; Li, K.; Jiao, Y.; Cheng, Y.; Yan, Y. Unusual sesquillignans with anti-inflammatory activities from the resin of *Ferula sinkiangensis*. *Bioorg. Chem.* **2022**, *127*, 105986.
- [46] Yi, X.; Li, Z.; Zheng, Q.; Sang, R.; Li, H.; Gao, G.; Qin, Q.; Zhu, N. Three new tetrahydrobenzofuran derivatives from *Ferula sinkiangensis* KM shen and their cytotoxic activities. *Nat. Prod. Res.* **2022**, 1-5. doi: 10.1080/14786419.2022.2075361.
- [48] Xing, Y.; Li, N.; Zhou, D.; Chen, G.; Jiao, K.; Wang, W.; Si, Y.; Hou, Y. Sesquiterpene coumarins from *Ferula sinkiangensis* act as neuroinflammation inhibitors. *Planta Med.* **2017**, *83*, 135-142.
- [50] Li, G.; Wang, J.; Li, X.; Cao, L.; Gao, L.; Lv, N.; Si, J. An unusual sesquiterpene coumarin from the seeds of *Ferula sinkiangensis*. *J. Asian Nat. Prod. Res.* **2016**, *18*, 891-896.
- [51] Li, G.; Li, X.; Cao, L.; Zhang, L.; Shen, L.; Zhu, J.; Wang, J.; Si, J. Sesquiterpene coumarins from seeds of *Ferula sinkiangensis*. *Fitoterapia* **2015**, *103*, 222-226.

- 
- [52] Li, G.; Wang, J.; Li, X.; Cao, L.; Lv, N.; Chen, G.; Zhu, J.; Si, J. Two New sesquiterpene coumarins from the seeds of *Ferula sinkiangensis*. *Phytochem. Lett.* **2015**, *13*, 123–126.
- [60] Ye, B.; Wang, S.; Zhang, L. Studies on the detoxification effects and acute toxicity of a mixture of cis-sec-butyl-1-propoenyl disulphide and trans-sec-butyl-1-propoenyl disulphide isolated from crude essential oil of *Ferula sinkiangensis* KM Shen, a Chinese traditional herbal medicine. *Nat. Prod. Res.* **2011**, *25*, 1161–1170.
